# Supplementary material for: Changing epidemiology of motor neurone disease in Scotland
Source: Springer Nature journal article supplement (doi:10.1007/s00415-019-09190-7), 2019-02-25
Supplement: MOESM1 [file 16506100]

|  |  | **1989-98** | | | **2015** | | | **2016** | | |
| --- | --- | --- | --- | --- | --- | --- | --- | --- | --- | --- |
| **Sex** | **Age Range** | **Number of Cases in Cohort** | **Crude Incidence (per 100,000 population)** | **Standardised Incidence Value** | **Number of Cases in Cohort** | **Crude Incidence (per 100,000 population)** | **Standardised Incidence Value** | **Number of Cases in Cohort** | **Crude Incidence (per 100,000 population)** | **Standardised Incidence** |
| Male | 0-4 | 0 | 0.00 | 0.00 | 0 | 0.00 | 0.00 | 0 | 0.00 | 0.00 |
| Female | 0-4 | 0 | 0.00 | 0.00 | 0 | 0.00 | 0.00 | 0 | 0.00 | 0.00 |
| Male | 5-9 | 0 | 0.00 | 0.00 | 0 | 0.00 | 0.00 | 0 | 0.00 | 0.00 |
| Female | 5-9 | 0 | 0.00 | 0.00 | 0 | 0.00 | 0.00 | 0 | 0.00 | 0.00 |
| Male | 10-14 | 1 | 0.06 | 6.35 | 0 | 0.00 | 0.00 | 0 | 0.00 | 0.00 |
| Female | 10-14 | 0 | 0.00 | 0.00 | 0 | 0.00 | 0.00 | 0 | 0.00 | 0.00 |
| Male | 15-19 | 1 | 0.06 | 6.78 | 0 | 0.00 | 0.00 | 0 | 0.00 | 0.00 |
| Female | 15-19 | 1 | 0.07 | 7.52 | 0 | 0.00 | 0.00 | 0 | 0.00 | 0.00 |
| Male | 20-24 | 1 | 0.05 | 5.51 | 0 | 0.00 | 0.00 | 0 | 0.00 | 0.00 |
| Female | 20-24 | 1 | 0.05 | 5.29 | 0 | 0.00 | 0.00 | 0 | 0.00 | 0.00 |
| Male | 25-29 | 4 | 0.19 | 20.21 | 0 | 0.00 | 0.00 | 0 | 0.00 | 0.00 |
| Female | 25-29 | 3 | 0.15 | 15.70 | 0 | 0.00 | 0.00 | 0 | 0.00 | 0.00 |
| Male | 30-34 | 4 | 0.19 | 18.99 | 1 | 0.59 | 58.80 | 1 | 5.80 | 58.02 |
| Female | 30-34 | 1 | 0.05 | 4.98 | 0 | 0.00 | 0.00 | 1 | 5.57 | 55.49 |
| Male | 35-39 | 9 | 0.49 | 49.21 | 2 | 1.27 | 127.55 | 2 | 12.40 | 124.54 |
| Female | 35-39 | 5 | 0.27 | 27.37 | 0 | 0.00 | 0.00 | 1 | 6.01 | 60.89 |
| Male | 40-44 | 20 | 1.20 | 124.73 | 1 | 0.59 | 61.08 | 4 | 24.25 | 252.08 |
| Female | 40-44 | 5 | 0.30 | 31.49 | 1 | 0.56 | 58.43 | 2 | 11.58 | 121.56 |
| Male | 45-49 | 37 | 2.18 | 244.36 | 9 | 4.70 | 526.62 | 6 | 31.68 | 355.05 |
| Female | 45-49 | 15 | 0.87 | 100.05 | 2 | 0.98 | 112.60 | 1 | 4.93 | 56.70 |
| Male | 50-54 | 43 | 3.07 | 335.65 | 11 | 5.58 | 609.80 | 2 | 10.13 | 110.76 |
| Female | 50-54 | 30 | 2.05 | 232.98 | 5 | 2.40 | 273.10 | 5 | 23.89 | 271.55 |
| Male | 55-59 | 79 | 6.00 | 571.42 | 20 | 11.29 | 1075.69 | 8 | 44.26 | 421.55 |
| Female | 55-59 | 55 | 3.87 | 392.46 | 6 | 3.23 | 327.58 | 5 | 26.30 | 266.75 |
| Male | 60-64 | 86 | 7.05 | 569.46 | 20 | 12.97 | 1047.35 | 21 | 134.27 | 1084.53 |
| Female | 60-64 | 69 | 5.01 | 437.90 | 13 | 7.99 | 698.16 | 12 | 72.66 | 635.11 |
| Male | 65-69 | 123 | 11.31 | 661.92 | 31 | 20.46 | 1197.65 | 31 | 202.00 | 1182.20 |
| Female | 65-69 | 110 | 8.39 | 552.29 | 17 | 10.53 | 693.05 | 11 | 67.05 | 441.37 |
| Male | 70-74 | 120 | 13.16 | 558.51 | 18 | 16.68 | 707.84 | 16 | 143.02 | 606.99 |
| Female | 70-74 | 110 | 8.82 | 444.02 | 14 | 11.25 | 566.53 | 15 | 117.97 | 593.89 |
| Male | 75-79 | 80 | 15.47 | 492.32 | 18 | 21.76 | 692.63 | 12 | 145.43 | 462.81 |
| Female | 75-79 | 76 | 8.83 | 365.16 | 20 | 19.07 | 788.70 | 11 | 105.43 | 436.01 |
| Male | 80-84 | 48 | 13.90 | 318.92 | 6 | 10.91 | 250.20 | 10 | 177.93 | 408.24 |
| Female | 80-84 | 56 | 7.93 | 273.50 | 10 | 12.61 | 434.81 | 11 | 137.13 | 472.95 |
| Male | 85-89 | 8 | 5.79 | 73.76 | 1 | 3.69 | 46.96 | 4 | 141.41 | 180.13 |
| Female | 85-89 | 18 | 4.54 | 106.54 | 3 | 6.14 | 144.00 | 3 | 60.37 | 141.67 |
| Male | 90+ | 2 | 5.00 | 25.79 | 0 | 0.00 | 0.00 | 2 | 166.43 | 85.85 |
| Female | 90+ | 3 | 1.72 | 23.34 | 1 | 3.52 | 47.83 | 0 | 0.00 | 0.00 |

**Supplementary Material: Direct standardisation by age and sex for 2015, 2016 and 1989-98**
